# Supplementary material for: Optimizing long chain-polyunsaturated fatty acid synthesis in salmonids by balancing dietary inputs
Source: PubMed Central journal article supplement (PMC6179257; doi:10.1371/journal.pone.0205347), 2018-10-10
Supplement: pone.0205347.s004.pdf [file pone.0205347.s004.pdf]

Table S1. Results from testing linear models based on data from published literature.

| Model   |        | Slope | r <sup>2</sup> | p-value | T-stat | p-value |
|---------|--------|-------|----------------|---------|--------|---------|
| Diet    | Tissue |       |                |         |        |         |
| DHA     | DHA    | 0.74  | 35.5           | <0.001  | -0.73  | 0.463   |
| EPA     | EPA    | 1.04  | 73.5           | <0.001  | -0.60  | 0.549   |
| ARA     | ARA    | 1.02  | 32.3           | <0.001  | -2.23  | 0.027   |
| ALA     | DHA    | 1.36  | 13.9           | <0.001  | 0.20   | 0.845   |
| ALA     | EPA    | 0.83  | 14.7           | <0.001  | -0.04  | 0.968   |
| ALA     | ARA    | 0.73  | 2.9            | 0.098   | -2.12  | 0.036   |
| LNA     | DHA    | 0.34  | 14.8           | <0.001  | -2.37  | 0.019   |
| LNA     | EPA    | 0.17  | 10.1           | 0.001   | -2.64  | 0.009   |
| LNA     | ARA    | 0.99  | 3.6            | 0.065   | -1.33  | 0.188   |
| SFA     | DHA    | 0.52  | 12.4           | 0.007   | -3.16  | 0.002   |
| SFA     | EPA    | 0.27  | 10.9           | 0.011   | -4.89  | 0.000   |
| SFA     | ARA    | 0.51  | 5.5            | 0.091   | -3.66  | 0.000   |
| MUFA    | DHA    | 0.06  | 0.3            | 0.594   | -1.28  | 0.202   |
| MUFA    | EPA    | 0.25  | 5.2            | 0.028   | -0.96  | 0.337   |
| MUFA    | ARA    | 0.52  | 2.3            | 0.147   | -0.55  | 0.586   |
| ARA     | DHA    | 0.33  | 10.7           | 0.001   | -0.69  | 0.488   |
| ARA     | EPA    | 0.56  | 47.8           | <0.001  | -1.34  | 0.182   |
| ALA:LNA | DHA    | 0.175 | 1.5            | 0.220   | 7.90   | 0.000   |
| ALA:LNA | ARA    | 0.005 | 0.0            | 0.982   | 2.84   | 0.005   |
